# Supplementary material for: Electrochemical quantification of transmitter concentration in single nanoscale vesicles isolated from PC12 cells
Source: Royal Society of Chemistry journal article supplement (doi:10.1039/c8fd00020d), 2018-01-01
Supplement: c8fd00020d1.pdf [file c8fd00020d1.pdf]

## Supporting Information

### **Electrochemical Quantification of Transmitter Concentration in Single Nanoscale Vesicles Isolated from PC12 Cells**

Xianchan Li,<sup>a</sup> Johan Dunevall,<sup>b</sup> and Andrew G. Ewing<sup>\*ab</sup>

<sup>a</sup> Department of Chemistry and Molecular Biology, University of Gothenburg, SE-405 30  
Gothenburg, Sweden

<sup>b</sup> Department of Chemical and Chemical Engineering, Chalmers University of Technology, SE-  
412 96 Gothenburg, Sweden

#### **Corresponding Author**

\* E-mail: [andrew.ewing@chem.gu.se](mailto:andrew.ewing@chem.gu.se)

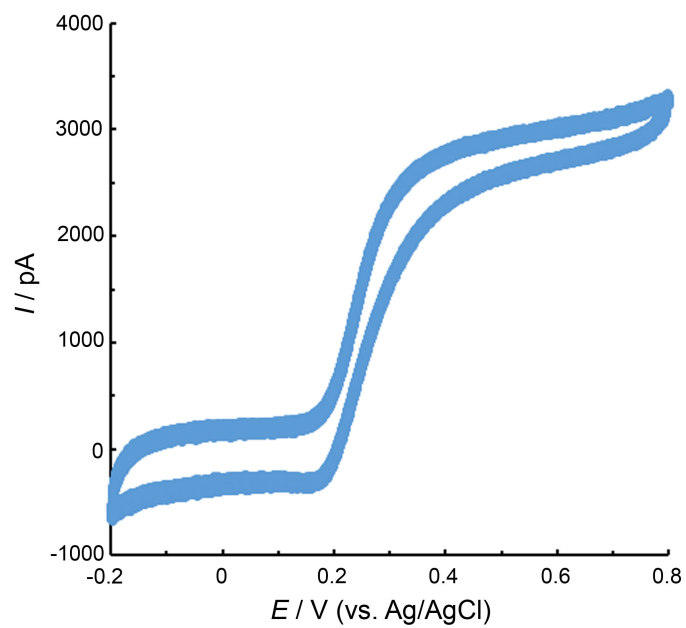

**Fig. S1.** Typical cyclic voltammetry of 33  $\mu\text{m}$  diameter disk microelectrode (-0.2 to 0.8 V vs. Ag/AgCl, 100 mV/s) in 100  $\mu\text{M}$  dopamine in PBS (pH 7.4).

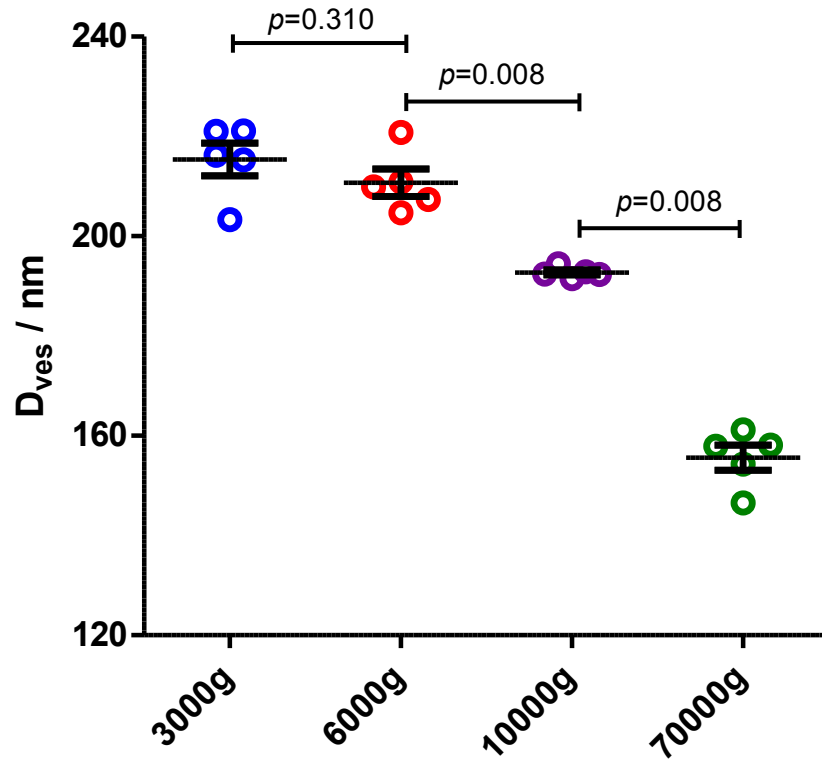

**Fig. S2.** Average diameters of individual vesicles obtained with differential centrifugation quantified with nanoparticle tracking analysis (NTA). The data are presented as mean  $\pm$  standard error of the mean (SEM). Blue, 3000 g; red, 6000 g; purple, 10000 g; green, 70000 g.  $N = 6$  isolations. The pairs of data sets were compared using a two-tailed Wilcoxon–Mann–Whitney rank-sum test, and  $p$ -values are indicated in the figure.

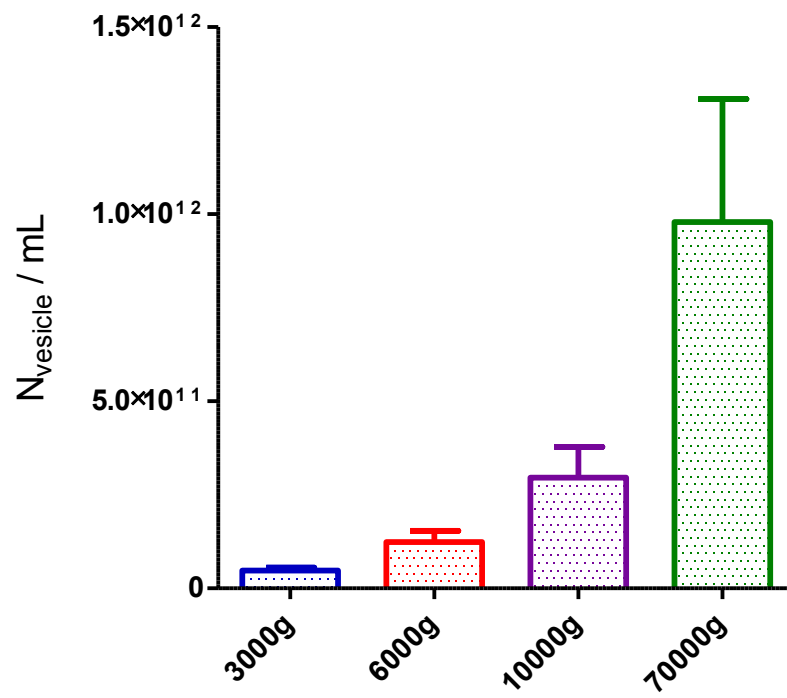

**Fig. S3.** Average number of vesicles per milliliter detected in NTA for vesicle samples obtained with differential centrifugation. Error bar, SEM. N = 6 isolations. Blue, 3000 g; red, 6000 g; purple, 10000 g; green, 70000 g.
